# Supplementary material for: T Cell-Intrinsic CDK6 Is Dispensable for Anti-Viral and Anti-Tumor Responses In Vivo
Source: PubMed Central journal article supplement (PMC8264666; doi:10.3389/fimmu.2021.650977), 2021-06-24

## Supplementary Material

### T cell-intrinsic CDK6 is dispensable for anti-viral and anti-tumor responses *in vivo*

Klara Klein<sup>1</sup>, Agnieszka Witalisz-Siepracka<sup>1,2</sup>, Dagmar Gotthardt<sup>1</sup>, Benedikt Agerer<sup>3</sup>, Felix Locker<sup>4</sup>, Reinhard Grausenburger<sup>1</sup>, Vanessa Maria Knab<sup>1</sup>, Andreas Bergthaler<sup>3</sup>, Veronika Sexl<sup>1\*</sup>

<sup>1</sup> Institute of Pharmacology and Toxicology, University of Veterinary Medicine Vienna, Vienna, Austria.

<sup>2</sup> Karl Landsteiner University of Health Sciences, Department of Pharmacology, Physiology and Microbiology, Division Pharmacology, Krems, Austria.

<sup>3</sup> CeMM Research Center for Molecular Medicine of the Austrian Academy of Sciences, Vienna, Austria.

<sup>4</sup> Institute of Physiology, Pathophysiology and Biophysics, University of Veterinary Medicine, Vienna, Austria.

\* **Correspondence:** Email: [veronika.sexl@vetmeduni.ac.at](mailto:veronika.sexl@vetmeduni.ac.at)

## Supplementary Figures 1-6

**Figure S1. Loss of CDK6 and its kinase activity deregulates major cellular processes as well as expression of interferon-stimulated genes in steady-state CD8<sup>+</sup> T cells.** Splenic CD3<sup>+</sup>CD8<sup>+</sup> T cells from WT, *Cdk6*<sup>-/-</sup> and *Cdk6*<sup>K43M</sup> mice were sorted *ex vivo* and lysed for RNA-sequencing. Three biological replicates (each pooled from two mice) were prepared per genotype. (A-B) Venn diagrams of significantly (FDR < 0.05, >1.25x fold change) upregulated (A) or downregulated (B) genes in *Cdk6*<sup>-/-</sup> and *Cdk6*<sup>K43M</sup> vs. WT CD8<sup>+</sup> T cells are shown. (C-D) Pathway analysis was performed using the Reactome Pathway tool with genes that were significantly upregulated (C) or downregulated (D) in *Cdk6*<sup>K43M</sup> compared to WT CD8<sup>+</sup> T cells. Significant pathways (FDR<0.05) are ranked by fold enrichment. Bar graphs show the top 20 non-redundant Reactome pathways in (C), while all significant non-redundant pathways are depicted in (D). (E) A Venn diagram overlapping significantly (FDR < 0.05, >1.25x fold change) downregulated genes in *Cdk6*<sup>-/-</sup> vs. WT CD8<sup>+</sup> T cells with core type I and II ISGs (according to interferome database) is shown. Genes contained in the intersections are listed.

Genes that were part of the Reactome pathway “interferon signaling” (Fig. 2D) are indicated in bold, genes that were also downregulated in *Cdk6*<sup>K43M</sup> vs. WT CD8<sup>+</sup> T cells are indicated in blue.

**Figure S2. Loss of CDK6 impairs CD8<sup>+</sup> T cell proliferation *in vitro*.** (A) The frequencies of CD4/CD8 double-negative (DN), CD4/CD8 double-positive (DP), CD4 single-positive (CD4 SP) and CD8 single-positive (CD8 SP) thymocytes were analyzed by flow cytometry in *Cdk6*<sup>fl/fl</sup> CD4-Cre mice and *Cdk6*<sup>fl/fl</sup> controls (n=4-7). (B-C) Naïve CD8<sup>+</sup> T cells were isolated from spleens of *Cdk6*<sup>fl/fl</sup> and *Cdk6*<sup>fl/fl</sup> CD4-Cre mice and labelled with CFSE. CFSE proliferation dye dilution was analyzed after 72h of culture by flow cytometry. (B) Representative histograms and (C) quantifications of the percentages of cells in each of the CFSE peaks/generations (numbered from 1-7, where 1 is the population with the lowest proliferation and 7 is the population with the highest amount of cell divisions) are shown (n=3). (D-E) Splenic naïve CD8<sup>+</sup> T cells were isolated from *Cdk6*<sup>fl/fl</sup> and *Cdk6*<sup>fl/fl</sup> CD4-Cre mice and activated with  $\alpha$ CD3/ $\alpha$ CD28 for 48h in the presence of IL-2. Expression of CD69, CD25, CD44, CD62L and Ki67 were analyzed by flow cytometry. (D) Representative histograms for each marker on cultured *Cdk6*<sup>fl/fl</sup> (in blue) and *Cdk6*<sup>fl/fl</sup> CD4-Cre CD8<sup>+</sup> T cells (in red) and a negative staining control (FMO = fluorescence minus one) (in black) are shown. (E) Quantifications of expression levels as relative median fluorescence intensity (MFI) are shown, calculated as fold of change over WT levels (n=3-8). (A,C,E) Bar graphs represent mean  $\pm$  SEM, from one experiment (C) or pooled from 2-3 independent experiments. \*\*\*p<0.001, \*\*p<0.01, \*p<0.05, unpaired t-test.

**Figure S3. CDK6-deficient CD8<sup>+</sup> T cells show increased IL-2 production *in vitro*.** (A) Splenic naïve CD8<sup>+</sup> T cells were isolated from *Cdk6*<sup>fl/fl</sup> and *Cdk6*<sup>fl/fl</sup> CD4-Cre mice, activated with  $\alpha$ CD3/ $\alpha$ CD28 for 48h and cultured in the presence of IL-2 for a total of six days. Percentages of naïve (CD62L+CD44-), central memory (CD62L+CD44+) and effector memory (CD62L-CD44+) CD8<sup>+</sup> T cells were analyzed after six days of culture by flow cytometry (n=4). (B) Percentages of CD62L+CD44-, CD62L+CD44+, CD62L-CD44+ splenic CD8<sup>+</sup> T cells were analyzed *ex vivo* by flow cytometry in *Cdk6*<sup>fl/fl</sup> and *Cdk6*<sup>fl/fl</sup> CD4-Cre mice (n=7-9). (C) Percentages of CD69<sup>+</sup> CD8<sup>+</sup> T cells (left panel) and CD69 expression levels (median fluorescence intensity (MFI)) on CD69<sup>+</sup> CD8<sup>+</sup> T cells (right panel) were analyzed *ex vivo* by flow cytometry in spleens of *Cdk6*<sup>fl/fl</sup> and *Cdk6*<sup>fl/fl</sup> CD4-Cre mice (n=6). (D) Percentages of Ki67<sup>+</sup> CD8<sup>+</sup> T cells (left panel) and Ki67 levels (MFI) on Ki67<sup>+</sup> CD8<sup>+</sup> T cells (right panel) were analyzed *ex vivo* by flow cytometry in spleens of *Cdk6*<sup>fl/fl</sup> and *Cdk6*<sup>fl/fl</sup> CD4-Cre mice (n=6). (E-G) Isolated naïve CD8<sup>+</sup> T cells were cultured as described in (A). Cultured

*Cdk6*<sup>fl/fl</sup> and *Cdk6*<sup>fl/fl</sup> CD4-Cre CD8+ T cells were kept unstimulated or stimulated with PMA/Iono(mycin) for 4h and percentages of IFN- $\gamma$  (E), TNF- $\alpha$  (F) and IL-2 (G) positive CD8+ T cells were analyzed by intracellular flow cytometric staining (n=4-5). (H) *Cdk6*<sup>fl/fl</sup> and *Cdk6*<sup>fl/fl</sup> CD4-Cre mice were subcutaneously injected into both flanks with 10<sup>6</sup> MC38 tumor cells. The weights of the isolated tumors were determined 16 days post injection (n=4-5 mice per genotype (8-10 tumors per genotype)). (I) CDK6 ChIP-seq was previously performed in p185<sup>BCR-ABL</sup>-transformed B cell lines (GSE113752). CDK6 ChIP-seq results from three biological replicates (WT1-3) at the *Mx1* locus are shown. Corresponding input samples are shown as controls. (A-G) Bar graphs represent mean  $\pm$  SEM, pooled from 2-3 independent experiments. (H) Bar graph represents mean  $\pm$  SEM with symbols representing values from individual tumors from one experiment. \*\*\*p<0.001, \*\*p<0.01, \*p<0.05, unpaired t-test.

**Figure S4. T cell-intrinsic loss of CDK6 is associated with a higher percentage of naïve and lower percentage of effector memory CD4+ T cells in steady-state.** (A-B) Total numbers (left panel) and percentages (right panel) of CD4+ T cells in spleens (n=7-9) (A) and peripheral lymph nodes (pLNs) (n=6) (B) were analyzed *ex vivo* by flow cytometry in *Cdk6*<sup>fl/fl</sup> and *Cdk6*<sup>fl/fl</sup> CD4-Cre mice. (C-D) Total numbers (left panel) and percentages (right panel) of regulatory T cells (Tregs) (CD25+Foxp3+CD4+ T cells) in spleens (n=6) (C) and pLNs (n=6) (D) were analyzed *ex vivo* by flow cytometry in *Cdk6*<sup>fl/fl</sup> and *Cdk6*<sup>fl/fl</sup> CD4-Cre mice. (E-F) Percentages of CD62L+CD44-, CD62L+CD44+, CD62L-CD44+ CD4+ T cells were analyzed in spleens (n=7-9) (E) and pLNs (n=6) (F) *ex vivo* by flow cytometry in *Cdk6*<sup>fl/fl</sup> and *Cdk6*<sup>fl/fl</sup> CD4-Cre mice. Total cell numbers in pLNs refer to total cell numbers in six pLNs (2x inguinal, 4x axillary LNs). (A-B,E-F) Bar graphs represent mean  $\pm$  SEM, pooled from 2 independent experiments. (C-D) Bar graphs represent mean  $\pm$  SEM from one experiment. \*\*p<0.01, \*p<0.05, unpaired t-test.

**Figure S5. Loss of CDK6 is associated with increased IL-2 production by activated CD4+ T cells.** (A-F) Naïve CD4+ T cells were sorted from spleens and pLNs of *Cdk6*<sup>fl/fl</sup> and *Cdk6*<sup>fl/fl</sup> CD4-Cre mice and activated with  $\alpha$ CD3/ $\alpha$ CD28 for 72h in the presence of IL-2. (A-B) Cultured *Cdk6*<sup>fl/fl</sup> and *Cdk6*<sup>fl/fl</sup> CD4-Cre CD4+ T cells were kept unstimulated or stimulated with PMA/Iono(mycin) for 4h and percentages of IL-2 positive CD4+ T cells were analyzed by intracellular flow cytometric staining (n=3). Representative dot plots (A) and the quantification (B) are shown. (C-F) Cell surface expression of the activation markers CD25 and CD69 was analyzed on cultured CD4+ T cells. Representative histograms for CD25 (C) and CD69 (E) expression on cultured *Cdk6*<sup>fl/fl</sup> (in blue) and *Cdk6*<sup>fl/fl</sup> CD4-Cre

CD4<sup>+</sup> T cells (in red) and a negative staining control (FMO) (in black) as well as quantifications of CD25 (D) and CD69 (F) expression levels are shown (n=3). (B,D,F) Bar graphs represent mean  $\pm$  SEM from one experiment. \*\*\*p<0.001, \*\*p<0.01, unpaired t-test.

**Figure S6. T cell-intrinsic loss of CDK6 is associated with decreased numbers of MC38 tumor-infiltrating CD4<sup>+</sup> T cells.** (A-F) 10<sup>6</sup> MC38 tumor cells were subcutaneously injected into both flanks of *Cdk6<sup>fl/fl</sup>* and *Cdk6<sup>fl/fl</sup>* CD4-Cre mice. Frozen tumor cell suspensions were prepared and analyzed by flow cytometry. (A) Absolute numbers (normalized to tumor weight) (left panel) and percentages of tumor-infiltrating CD4<sup>+</sup> T cells (within CD45<sup>+</sup> cells) (right panel) were analyzed by flow cytometry (n=4-5). (B) Absolute numbers (normalized to tumor weight) (left panel) and percentages of tumor-infiltrating Tregs (CD25<sup>+</sup>Foxp3<sup>+</sup>CD4<sup>+</sup> T cells) (within CD4<sup>+</sup> T cells) (right panel) were analyzed by flow cytometry (n=4-5). (C) Percentages of CD69<sup>+</sup> CD4<sup>+</sup> T cells (left panel) and CD69 expression levels (MFI) on tumor-infiltrating CD4<sup>+</sup> T cells (right panel) were analyzed by flow cytometry (n=4-5). (D) Percentages of CD69<sup>+</sup> Tregs (left panel) and CD69 expression levels (MFI) on Tregs (right panel) were analyzed by flow cytometry (n=4-5). (E-F) Percentages of CD62L<sup>+</sup>CD44<sup>-</sup>, CD62L<sup>+</sup>CD44<sup>+</sup>, CD62L<sup>-</sup>CD44<sup>+</sup> CD4<sup>+</sup> T cells (E) and Tregs (F) were analyzed by flow cytometry (n=4-5). (A-D) Bar graphs represent mean  $\pm$  SEM with symbols representing values from individual tumors from one experiment. (E-F) Bar graphs represent mean  $\pm$  SEM from one experiment. \*p<0.05, unpaired t-test.

Figure S1.

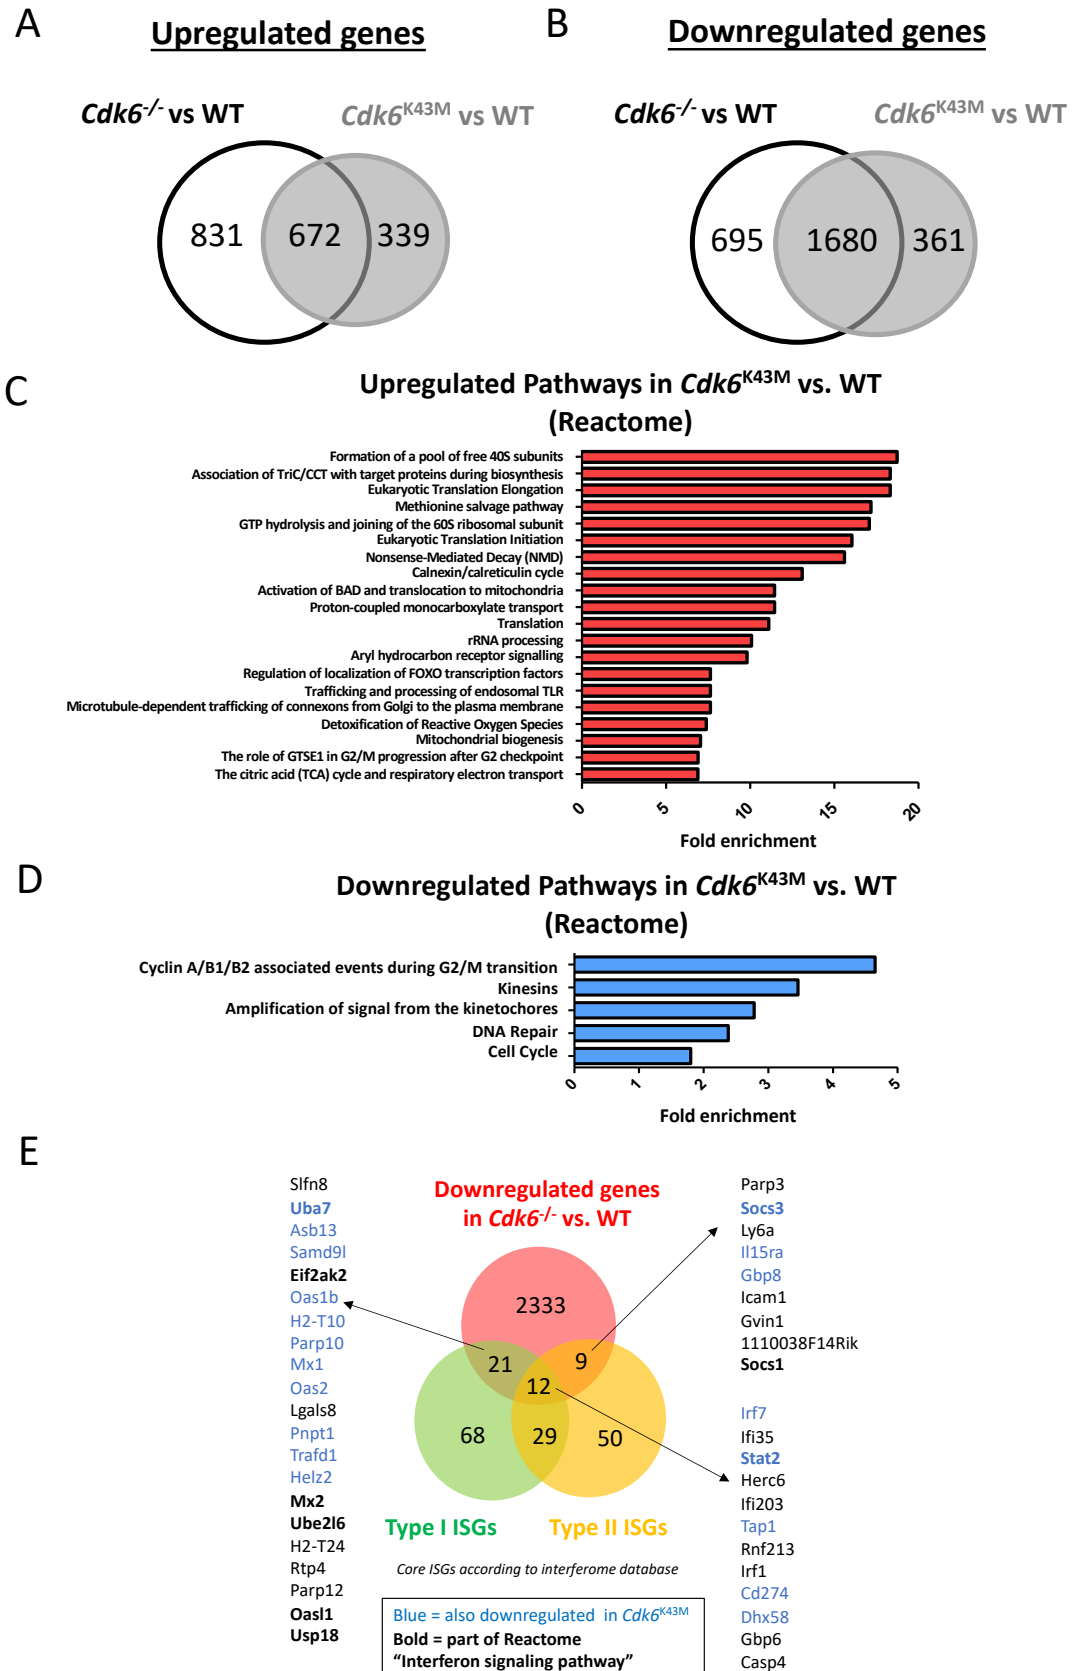

Figure S2.

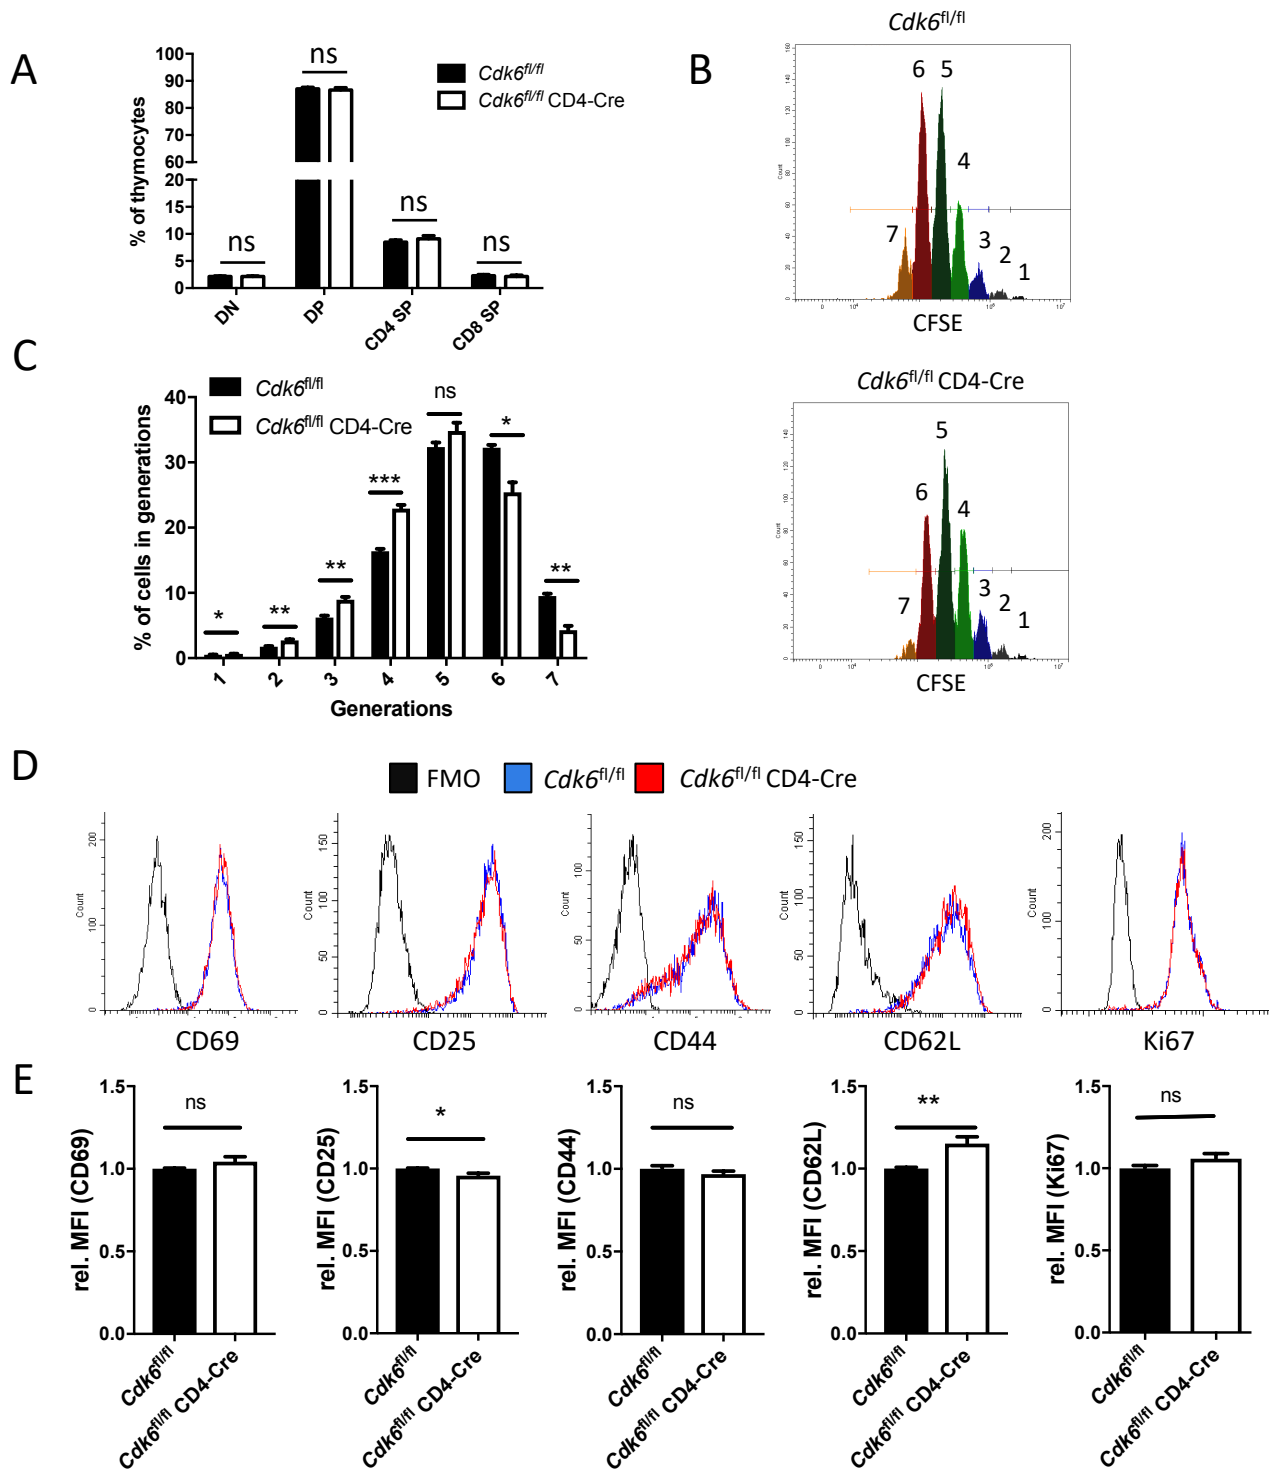

Figure S3.

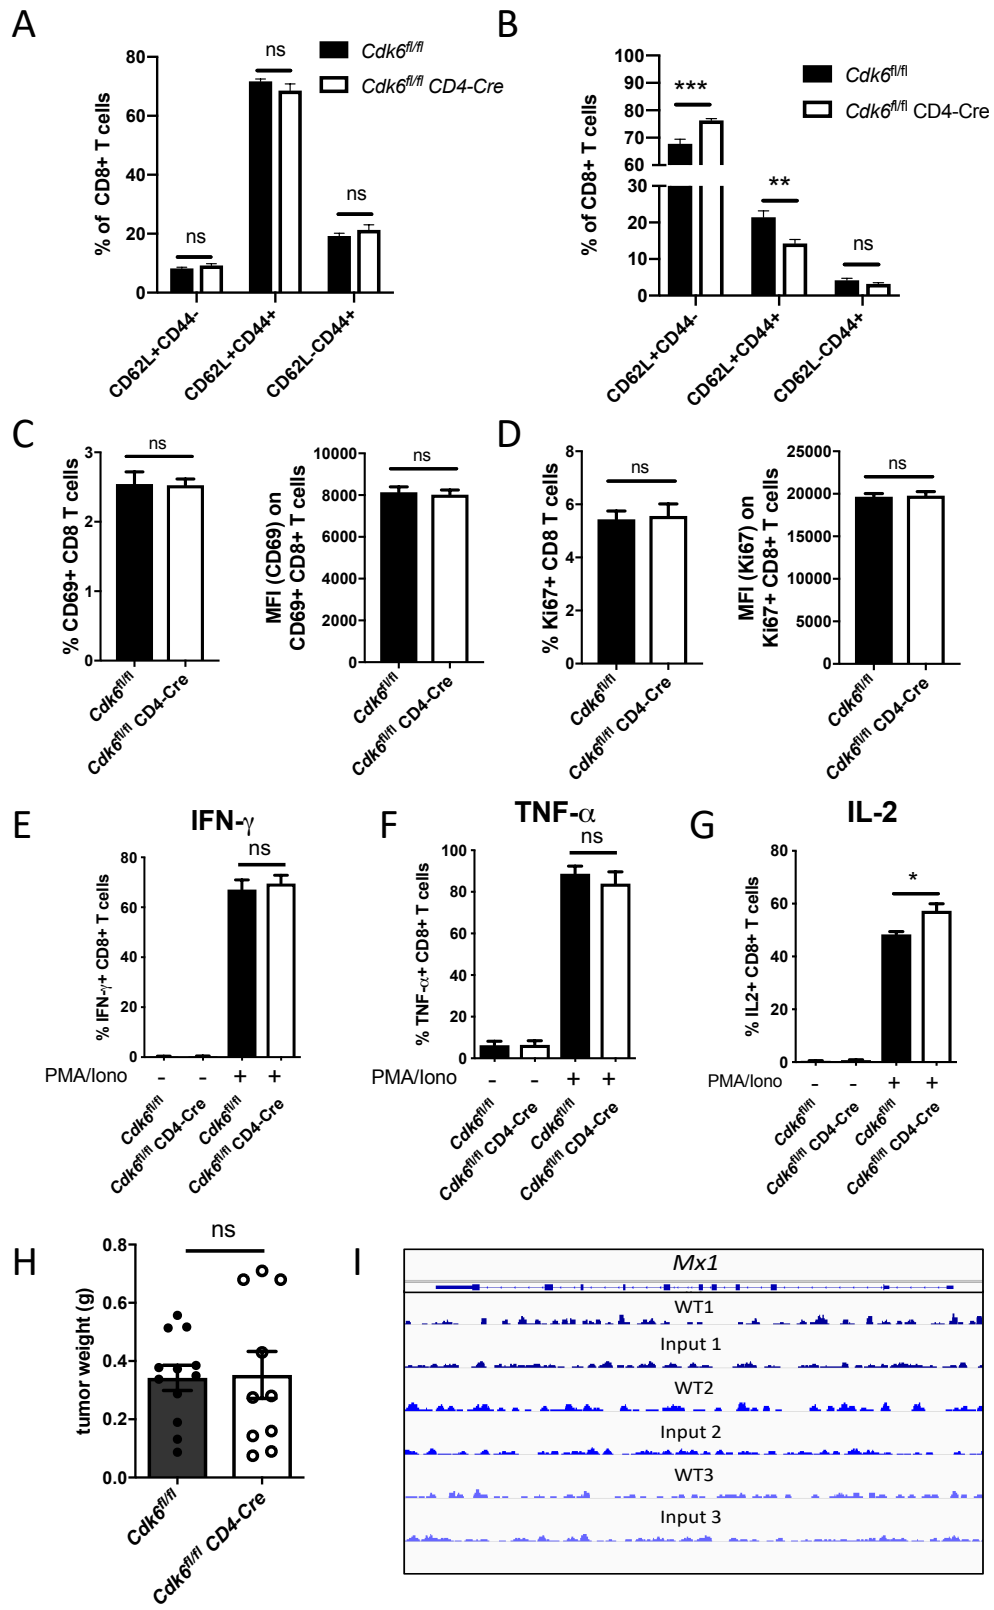

Figure S4.

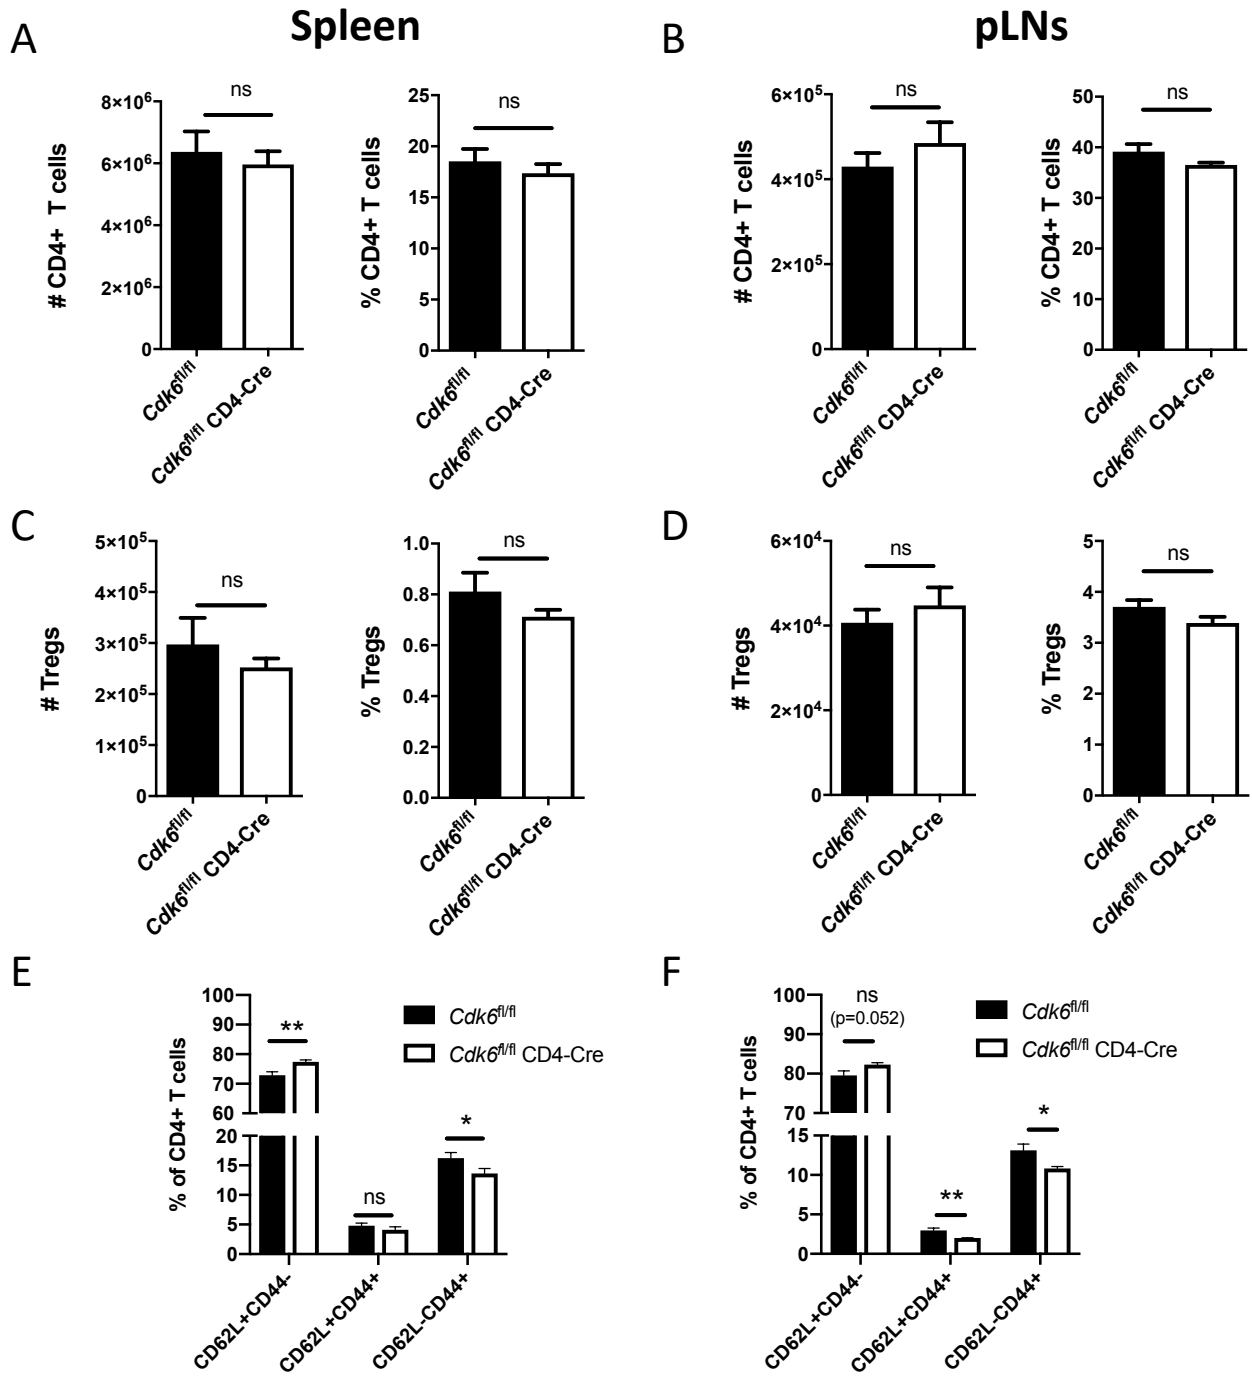





Figure S6.

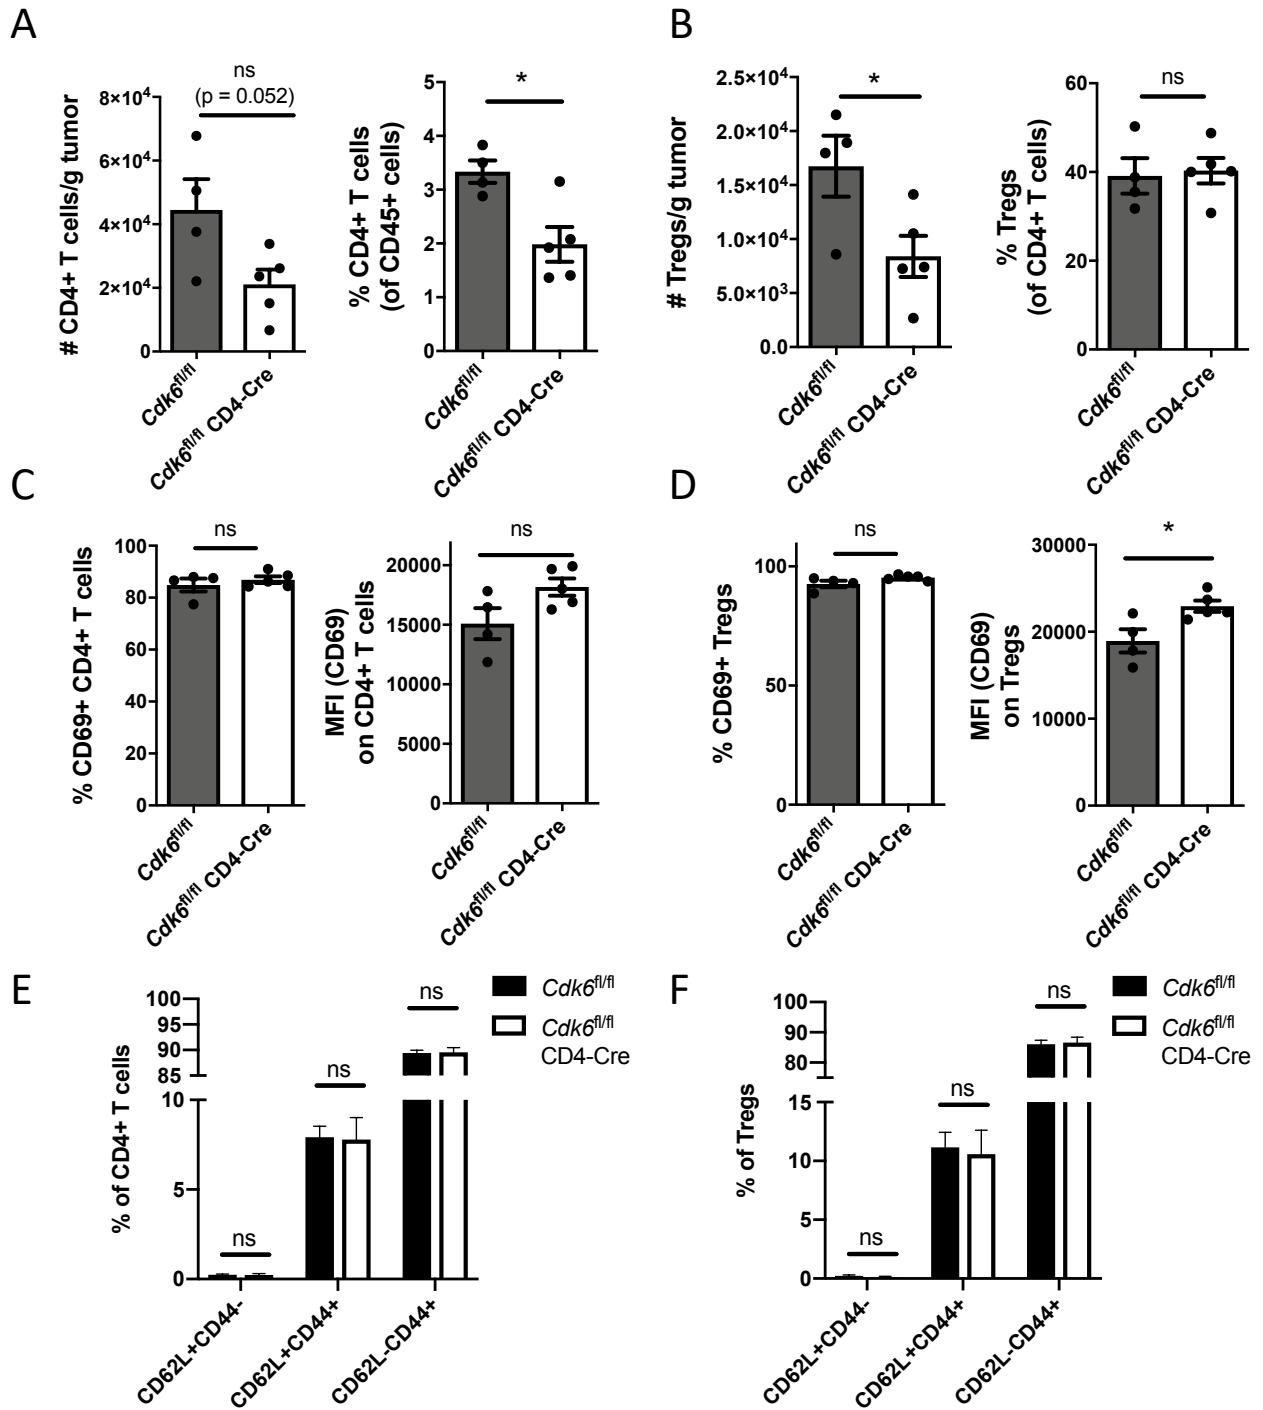

Supplement: DataSheet_1.pdf [file DataSheet_1.pdf]
